# Supplementary material for: Glow discharge electrolysis plasma induced synthesis of cellulose-based ionic hydrogels and their multiple response behaviors
Source: Royal Society of Chemistry journal article supplement (doi:10.1039/c4ra11222a), 2014-12-17
Supplement: c4ra11222a1.pdf [file c4ra11222a1.pdf]

## Supporting Information

### **Glow discharge electrolysis plasma induced synthesis of cellulose-based ionic hydrogels and their multiple response behaviors**

Wenming Zhang,<sup>\*a</sup> Zhu Sha,<sup>a</sup> Ying Huang,<sup>a</sup> Yunping Bai<sup>a</sup>, Ning Xi<sup>a</sup> and Yucang Zhang,<sup>\*b</sup>

<sup>a</sup> College of Physics Science and Technology, Hebei University, Baoding, Hebei province, China. Fax: +86 312

5079473; Tel: +86 312 5079473; E-mail: [wmzhang@hbu.edu.cn](mailto:wmzhang@hbu.edu.cn)

<sup>b</sup> College of Materials and Chemical Engineering, Hainan University, Haikou province, China. Fax: +86 898

66279219; Tel: +86 898 66279219; E-mail: [yczhang@hainu.edu.cn](mailto:yczhang@hainu.edu.cn)

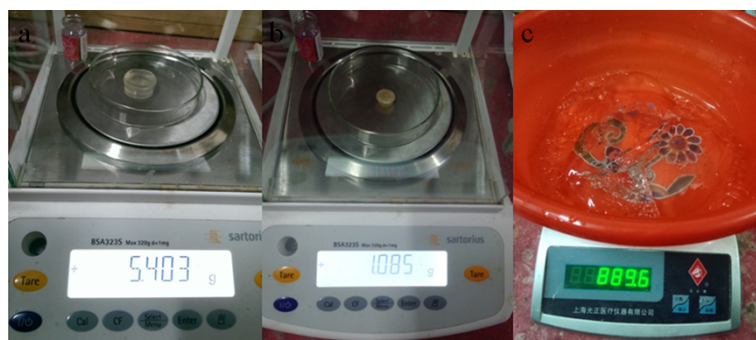

**Figure S1.** Photographs of wet hydrogel (a), dried hydrogels (b), and hydrogel after swelling equilibrium (c).

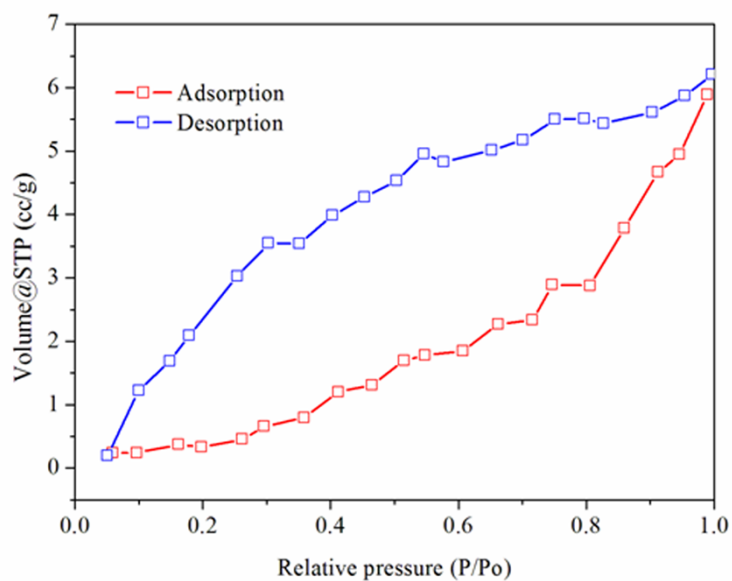

**Figure S2.** Nitrogen sorption isotherm of cellulose-based ionic hydrogel (the discharge voltage and discharge time is 570 V and 90 s, respectively).

Figure S2 shows the N<sub>2</sub> sorption isotherm of the freeze-dried cellulose-based ionic hydrogel after absorbing water sufficiently. The sample was measured using automated surface area and pore size analyzer (Quantachrome Autosorb-1 MP). The surface area was 2.131 m<sup>2</sup>/g.

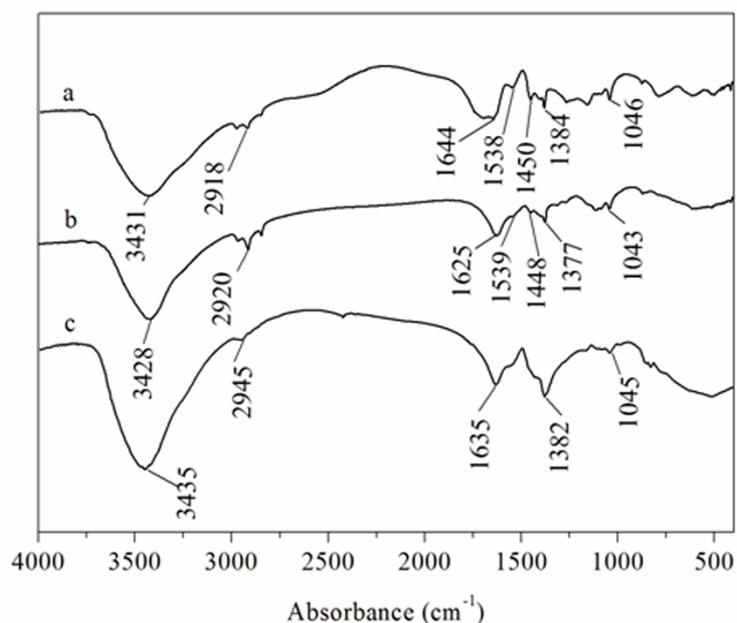

**Figure S3.** FT-IR of cellulose-based ionic hydrogels after adsorbing heavy metal ions (a)  $\text{Na}^+$ , (b)  $\text{Zn}^{2+}$ , and (c)  $\text{Fe}^{3+}$ .

Figure S3 shows the infrared spectrogram of cellulose-based ionic hydrogels after adsorbing heavy metal ions. As the  $\text{Na}^+$ ,  $\text{Zn}^{2+}$ ,  $\text{Fe}^{3+}$  ions were adsorbed by cellulose-based ionic hydrogels, the peak at  $1722\text{ cm}^{-1}$  ( $\text{C}=\text{O}$  stretching vibration) (Fig. 7b) was disappeared completely implying that complexation was possible and new peaks appeared at  $1644$ ,  $1625$ ,  $1635\text{ cm}^{-1}$  on curve (a), (b) and (c), respectively.<sup>1</sup> In addition, the peaks at  $1543$  and  $1456\text{ cm}^{-1}$  (the stretching vibration of  $\text{COO}^-$ ) (Fig. 7b) were shifted to lower wavenumbers after adsorbing  $\text{Na}^+$ ,  $\text{Zn}^{2+}$  metal ions, or even disappeared after adsorbing  $\text{Fe}^{3+}$ . Besides, the intensity of the peaks of  $\text{Zn}^{2+}$  was weaker than  $\text{Na}^+$ . All results indicated that oxygen atoms in cellulose-based ionic hydrogels donated unshared electron pairs to the metal ions to form coordinate-covalent bonds and the coordination between  $\text{Fe}^{3+}/\text{Zn}^{2+}$  and carboxyl group was obvious stronger than that  $\text{Na}^+$ .<sup>2-4</sup>

#### References:

1. Wang, X. G., Gao, J. Z. and Yang, W., Polymer Engineering and Science, 2012, 52, 2217-

2227.

2. Lu, Q. F., Yu, J., Gao, J. Z., Yang, W. and Li, Y., Central European Journal of Chemistry, 2012, 10, 1349-1359.
3. Lu, Q. F., Yu, J., Gao, J. Z., Yang, W. and Li, Y., Plasma Process. Polym., 2011, 8, 803–814.
4. Peng, X. W., Zhong, L. X., Ren, J. L., and Sun, R. C., J. Agric. Food Chem., 2012, 60, 3909–3916.
